# Supplementary material
Source: PubMed Central journal article supplement (PMC9034243)
Supplement: mmc1.pdf [file mmc1.pdf]

**Biophysical Journal, Volume 121**

**Supplemental information**

**Fluorescence lifetime-based pH mapping of tumors in vivo using genetically encoded sensor SypHerRed**

**Liubov Shimolina, Ekaterina Potekhina, Irina Druzhkova, Maria Lukina, Varvara Dudenkova, Vsevolod Belousov, Vladislav Shcheslavskiy, Elena Zagaynova, and Marina Shirmanova**

## Supplementary material

### Fluorescence lifetime-based pH mapping of tumors in vivo using new genetically encoded sensor SypHerRed

Liubov Shimolina<sup>1</sup>, Ekaterina Potekhina<sup>3</sup>, Irina Druzhkova<sup>2</sup>, Maria Lukina<sup>2</sup>, Varvara Dudenkova<sup>2</sup>, Vsevolod Belousov<sup>3,4</sup>, Vladislav Shcheslavskiy<sup>2</sup>, Elena Zagaynova<sup>1</sup>, Marina Shirmanova<sup>2,\*</sup>

<sup>1</sup> Institute of Biology and Biomedicine, Lobachevsky State University of Nizhny Novgorod, 23 Gagarin Ave., 603950 Nizhny Novgorod, Russia

<sup>2</sup> Institute of Experimental Oncology and Biomedical Technologies, Privolzhsky Research Medical University, 10/1 Minin and Pozharsky Sq., 603005 Nizhny Novgorod, Russia

<sup>3</sup> Pirogov Russian National Research Medical University, Laboratory of Experimental Oncology, 1 Ostrovityanova str., 117997 Moscow, Russia

<sup>4</sup> Federal Center of Brain Research and Neurotechnologies, Federal Medical Biological Agency, 1/10 Ostrovityanova str., 117997 Moscow, Russia

\*Correspondence: shirmanovam@gmail.com, vis@becker-hickl.de

The pH responses of fluorescence intensity ratio  $I_{488}/I_{405}$  and fluorescence lifetime of SypHer are shown in Figure S1.

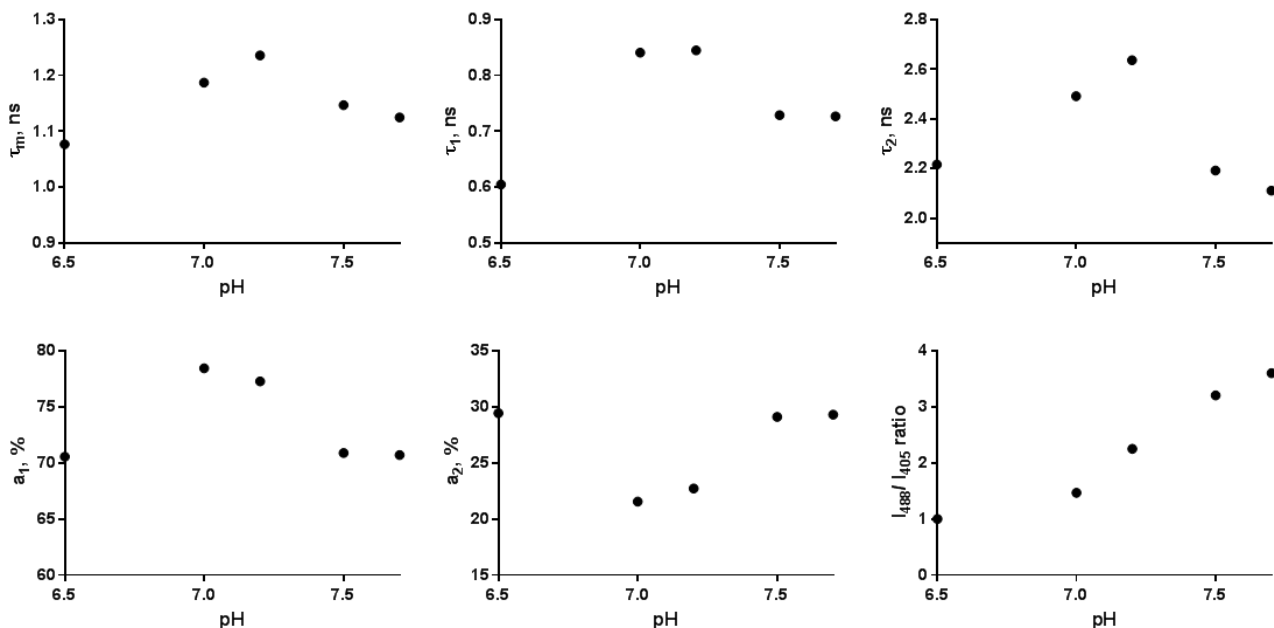

**Figure S1.** The fluorescence decay parameters  $\tau_m$ ,  $\tau_1$ ,  $\tau_2$ ,  $a_1$ ,  $a_2$  and fluorescence intensity ratio of SypHer plotted against pH. N = 20-30 cells for each pH value.

The pH responses of fluorescence intensity ratio  $I_{488}/I_{405}$  and fluorescence lifetime of SypHer-2 are shown in Figure S2.

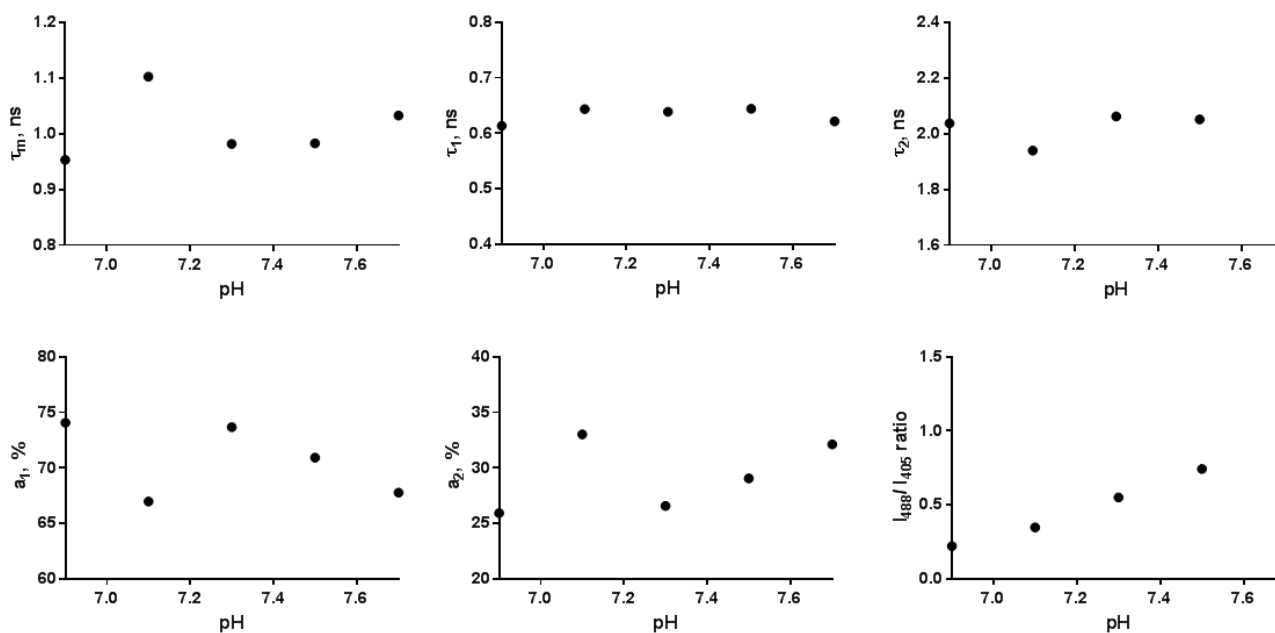

**Figure S2.** The fluorescence decay parameters  $\tau_m$ ,  $\tau_1$ ,  $\tau_2$ ,  $a_1$ ,  $a_2$  and fluorescence intensity ratio of SypHer-2 plotted against pH. N = 20-30 cells for each pH value.

In the case of SypHerRed, the short component of fluorescence lifetime  $\tau_1$  also demonstrated strong (non-linear) dependence on pH in the physiological range (Figure S3).

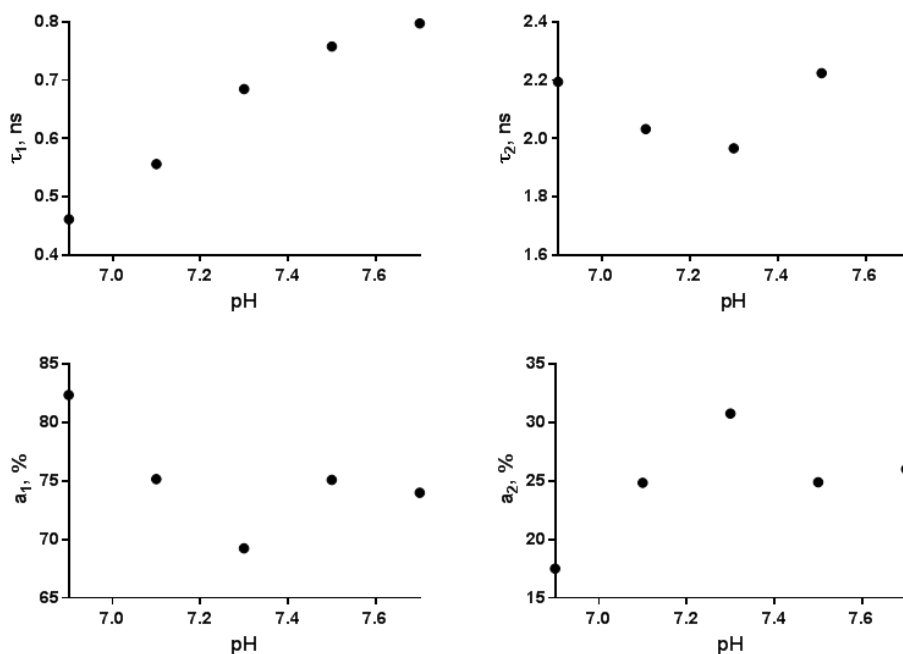

**Figure S3.** The fluorescence decay parameters  $\tau_1$ ,  $\tau_2$ ,  $a_1$ , and  $a_2$  of SypHerRed plotted against pH. N = 20-30 cells for each pH value.

In SypHerRed-expressing cells, high inter-cellular variability of fluorescence intensity was observed at different pH due to different expression level of the protein (Figure S4).

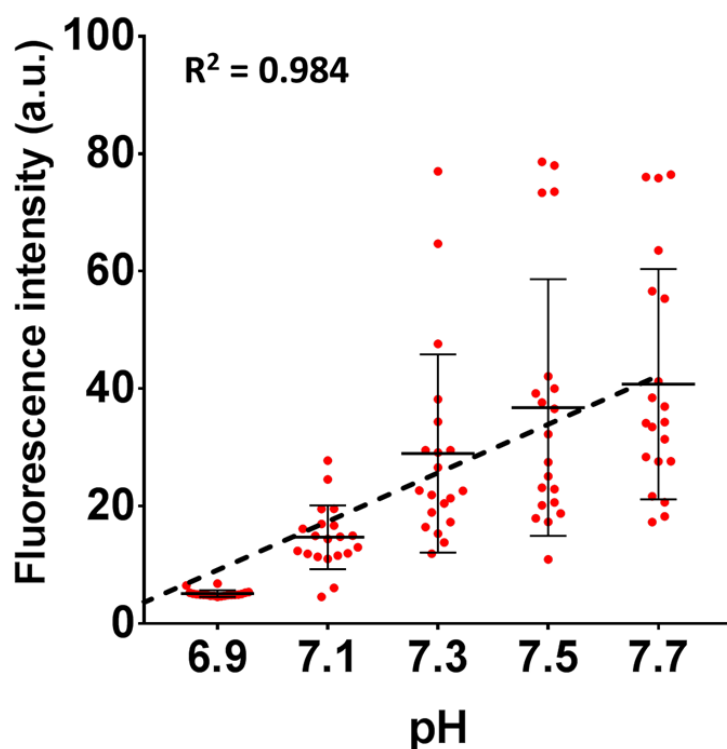

**Figure S4.** The fluorescence intensity of SypHerRed plotted against pH. Red dots are the experimental measurements for individual cells; dashed line is the approximation curve. N = 20-30 cells for each pH value. Mean  $\pm$  SD.

Figure S5 shows calibration curve for intracellular pH assessment in the whole cells imaged using FLIM-microscopy.

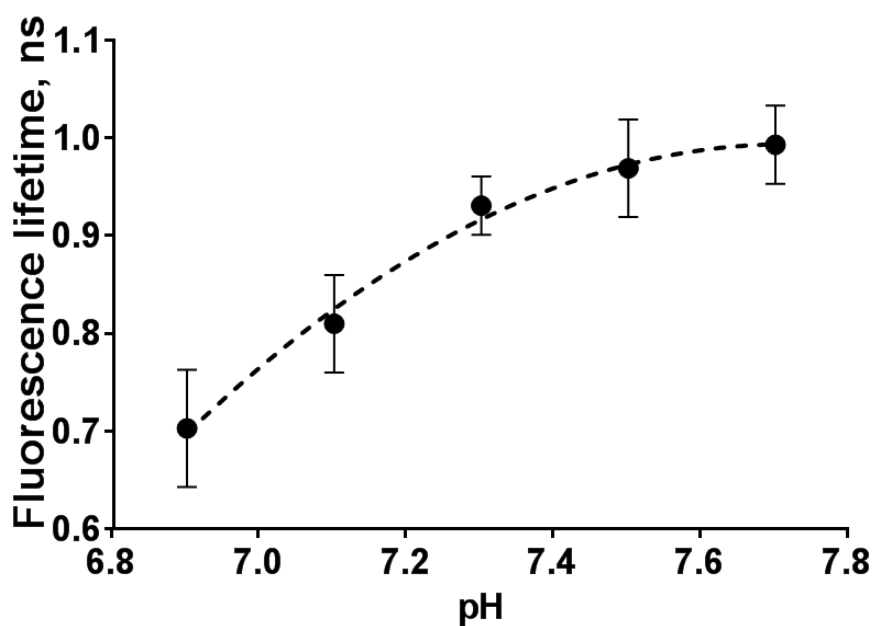

**Figure S5.** The fluorescence lifetime  $\tau_m$  plotted against pH for the whole cells. Mean  $\pm$  SD. N=20-30 cells for each pH value. Dashed line is the approximation curve.

Representative FLIM images ( $\tau_m$  and  $\chi^2$ ) of HeLa cells expressing SypHerRed and fluorescence decay curve of SypHerRed in the specific spot of the cell are shown in Figure S6.

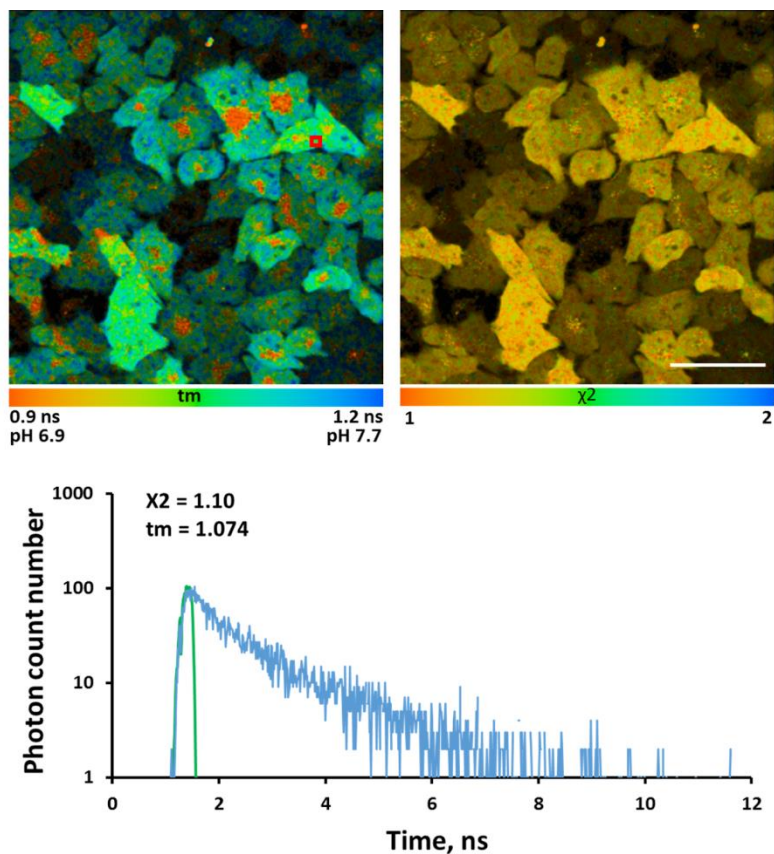

**Figure S6.** FLIM,  $\tau_m$  and  $\chi^2$  images and fluorescence decay curve of SypHerRed at pH 7.3 . Bar: 40  $\mu$ m. Nonlinear least squares algorithm and instrument response function IRF are used to obtain fluorescence lifetimes from the decay curves. IRF is green, decay curve is blue.

The study of tumor xenografts generated from SypHerRed-expressing HeLa cells on the macro-level, using IVIS-Spectrum system, showed a high degree of heterogeneity of fluorescence intensity in the tumor (Figure S7).

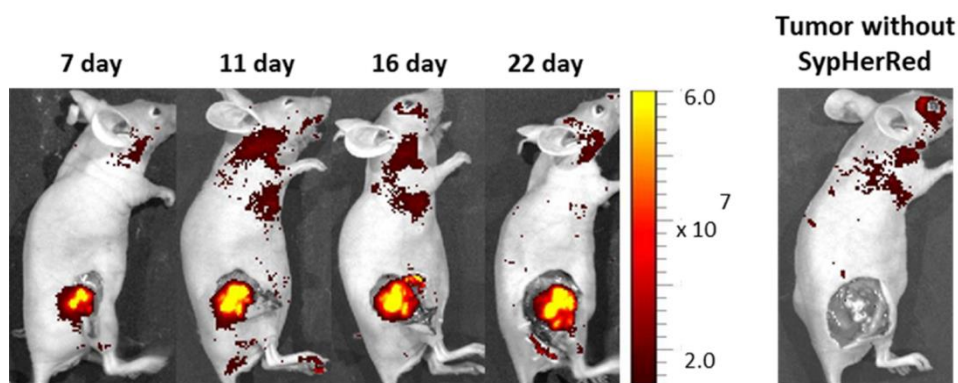

**Figure S7.** Fluorescence intensity of SypHerRed in mouse tumor *in vivo* during tumor growth (*left row*) and control image of the tumor without SypHerRed (*right*). Excitation at 540 nm, emission at 600 nm.
